# Supplementary material
Source: ML conference proceedings conference paper supplement (https://openaccess.thecvf.com/content/WACV_2020/html/Hong_Image_Hashing_via_WACV_2020_paper.html)
Supplement: Supplementary file 1 [file Hong_Image_Hashing_via_WACV_2020_supplemental.pdf]

# Image Hashing via Linear Discriminant Learning

Weixiang Hong\*  
National University of Singapore  
weixiang.hong@outlook.com

Yu-Ting Chang  
UC Merced  
ychang39@ucmerced.edu

Haifang Qin\*  
Peking University  
qhfpku@pku.edu.cn

Wei-Chih Hung  
UC Merced  
whung8@ucmerced.edu

Yi-Hsuan Tsai  
NEC Labs America  
wasidennis@gmail.com

Ming-Hsuan Yang  
UC Merced/Google  
mhyang@ucmerced.edu

## 1. Ablation Study on ResNet-50

We show an ablation study on CIFAR-10 to validate the effectiveness of loss functions proposed in our method using the ResNet-50 as the backbone. In Table 1, without using the proposed inter-class loss, the performance drops significantly.

Table 1. With/Without the LDA loss using the ResNet-50 backbone on CIFAR-10.

| mAP                             | 12 bits | 24 bits | 32 bits | 48 bits |
|---------------------------------|---------|---------|---------|---------|
| Without Inter Loss + Intra Loss | 83.1    | 84.5    | 85.6    | 86.3    |
| With Inter Loss + Intra Loss    | 86.9    | 87.2    | 88.3    | 88.1    |

## 2. Sensitivity Analysis

In Figure 1, we show the sensitive analysis of the loss weights  $\alpha$  and  $\beta$  on CIFAR-10. We use grid search to determine the value of hyper-parameters  $\alpha$  and  $\beta$ , and fix  $\alpha = 0.01$  and  $\beta = 0.001$  for all the experiments.

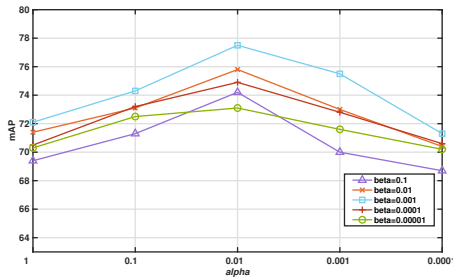

(a) Fix  $\beta$ , change  $\alpha$ .

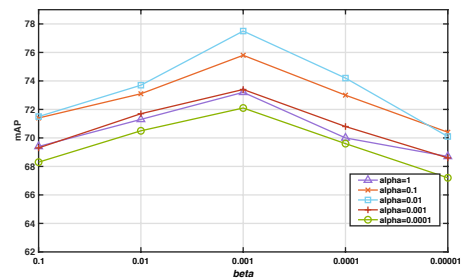

(b) Fix  $\alpha$ , change  $\beta$ .

Figure 1. mAP on the CIFAR-10 dataset.

## 3. Implementation Details

During training, we train LDH for 164 epochs and divide the learning rate by 10 at epoch 81 and 122. In addition, the train/test loss curve *w.r.t.* epoch is illustrated in Figure 2, while the change of train/test accuracy *w.r.t.* epoch is provided in Figure 3. With a single Nvidia Tesla v100 GPU, it takes around 40 minutes for training on the CIFAR-10 dataset, 6 hours on the ImageNet dataset, and 11 hours on the NUS-WIDE dataset.

\*Work done at Google.

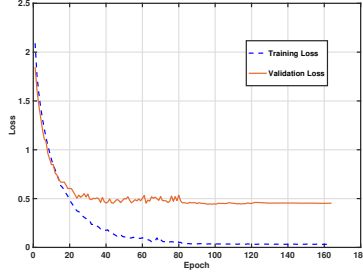

(a) CIFAR-10 dataset.

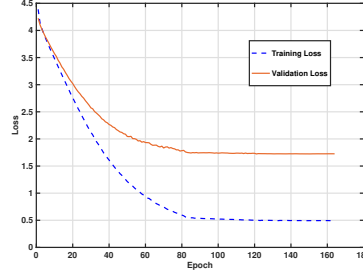

(b) ImageNet dataset.

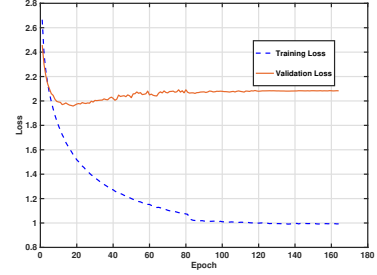

(c) NUS-WIDE dataset.

Figure 2. **The train/test loss of LDH.** From left to right, we show the results from CIFAR-10, NUS-WIDE and ImageNet.

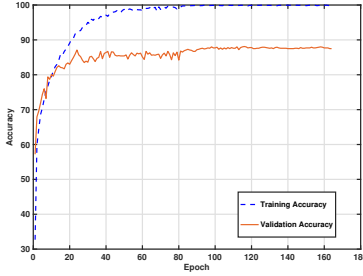

(a) CIFAR-10 dataset.

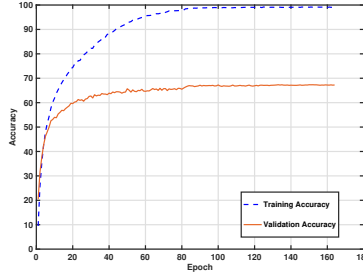

(b) ImageNet dataset.

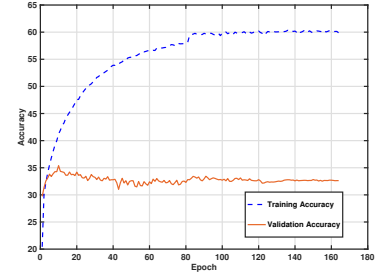

(c) NUS-WIDE dataset.

Figure 3. **The train/test accuracy of LDH.** From left to right, we show the results from CIFAR-10, ImageNet and NUS-WIDE.

#### 4. More Results and Analysis

In this section, we provide more retrieval examples in Figure 4, 5 and 6. The LDH algorithm is able to retrieve images that share the same semantic labels with the input query. In addition, we evaluate the performances of binary code using a recently proposed metric,  $mAP$  for unseen classes [1]. As shown in Table 2, our LDH achieves promising  $mAP$  for unseen classes on the CIFAR-10 dataset.

Table 2.  $mAP$  of unseen classes, with 16-bit binary code.

| methods | CCA-ITQ | DHN  | DPSH | HashNet | LDH (Ours) |
|---------|---------|------|------|---------|------------|
| $mAP$   | 15.4    | 17.9 | 18.5 | 19.8    | 20.4       |

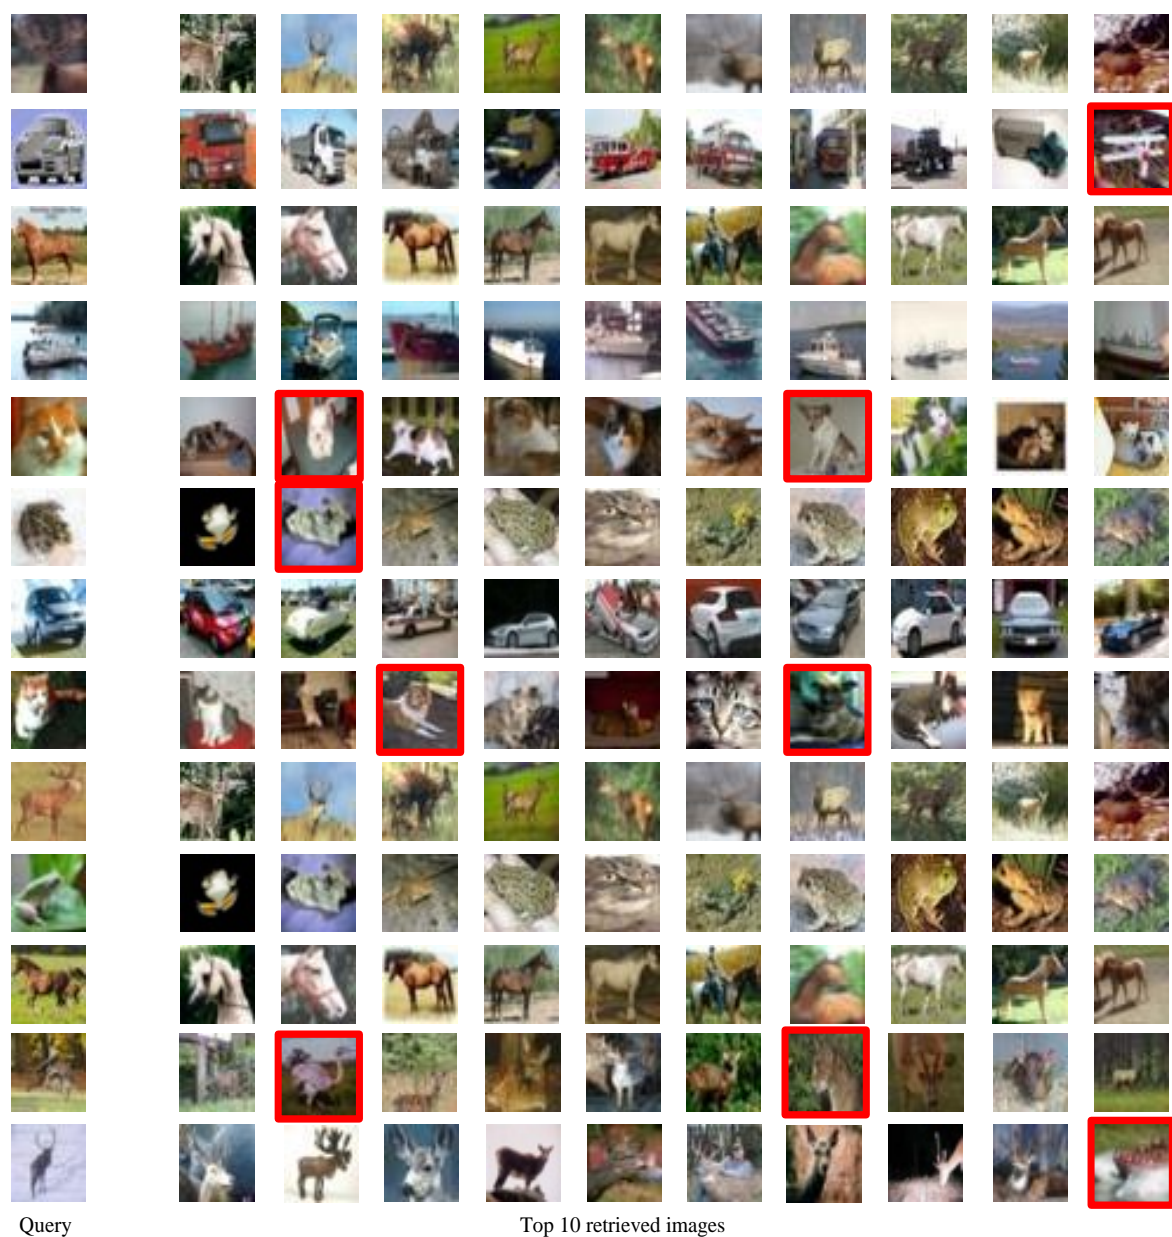

Figure 4. Retrieval results on the CIFAR-10 dataset. We use red rectangles to denote false positives.

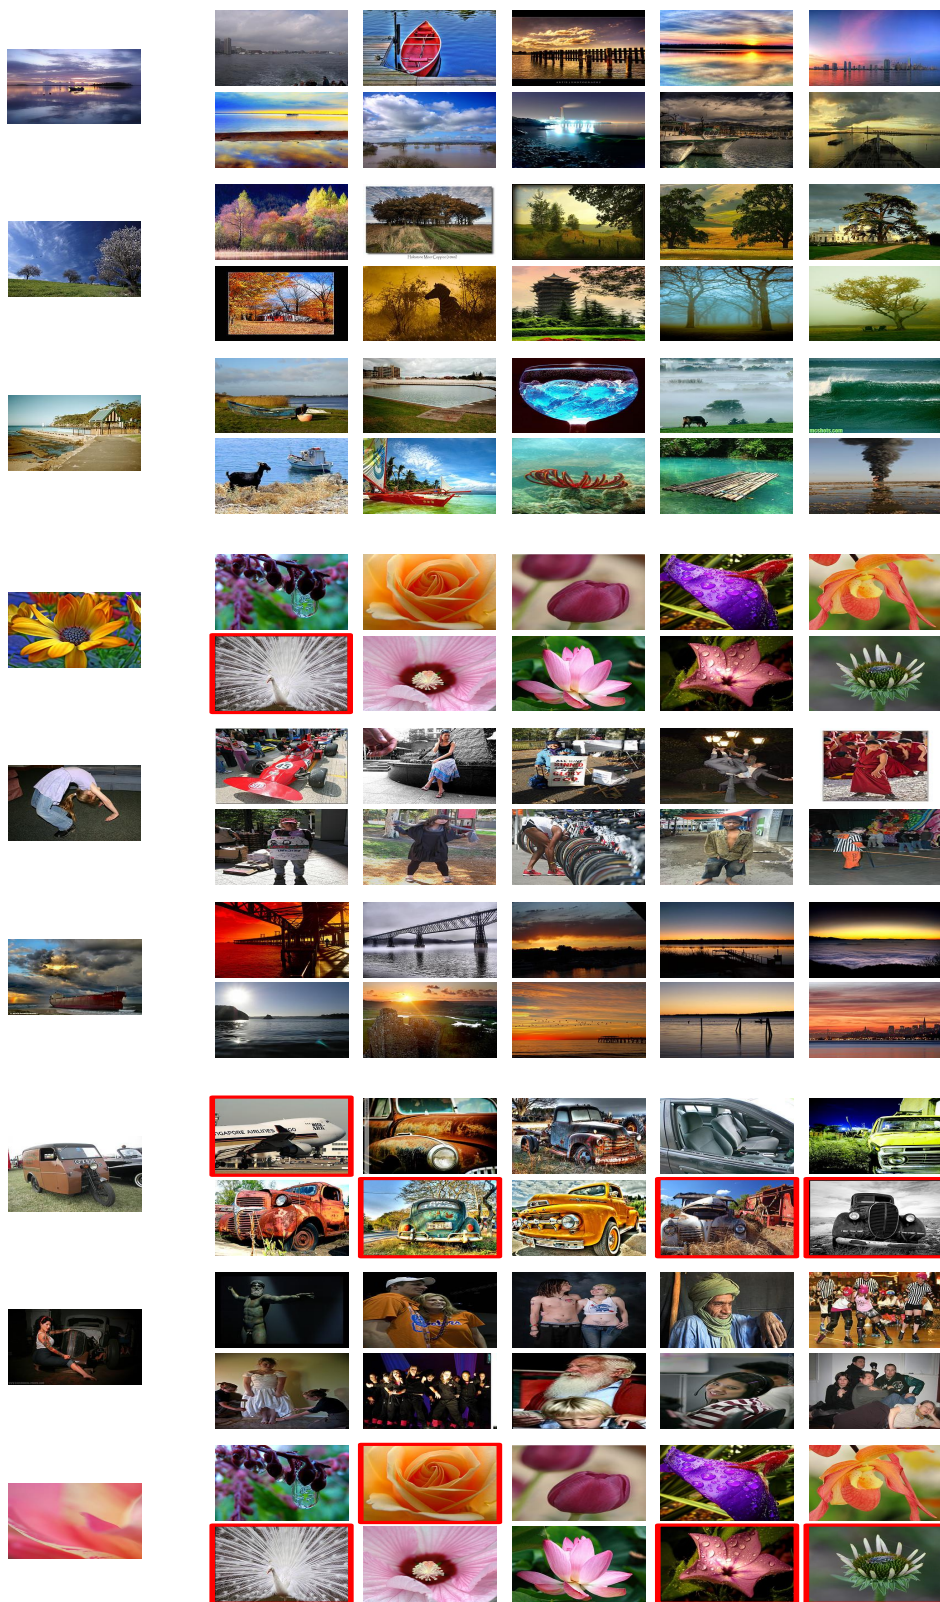

Figure 5. Retrieval results on the NUS-WIDE dataset. We use red rectangles to denote false positives.



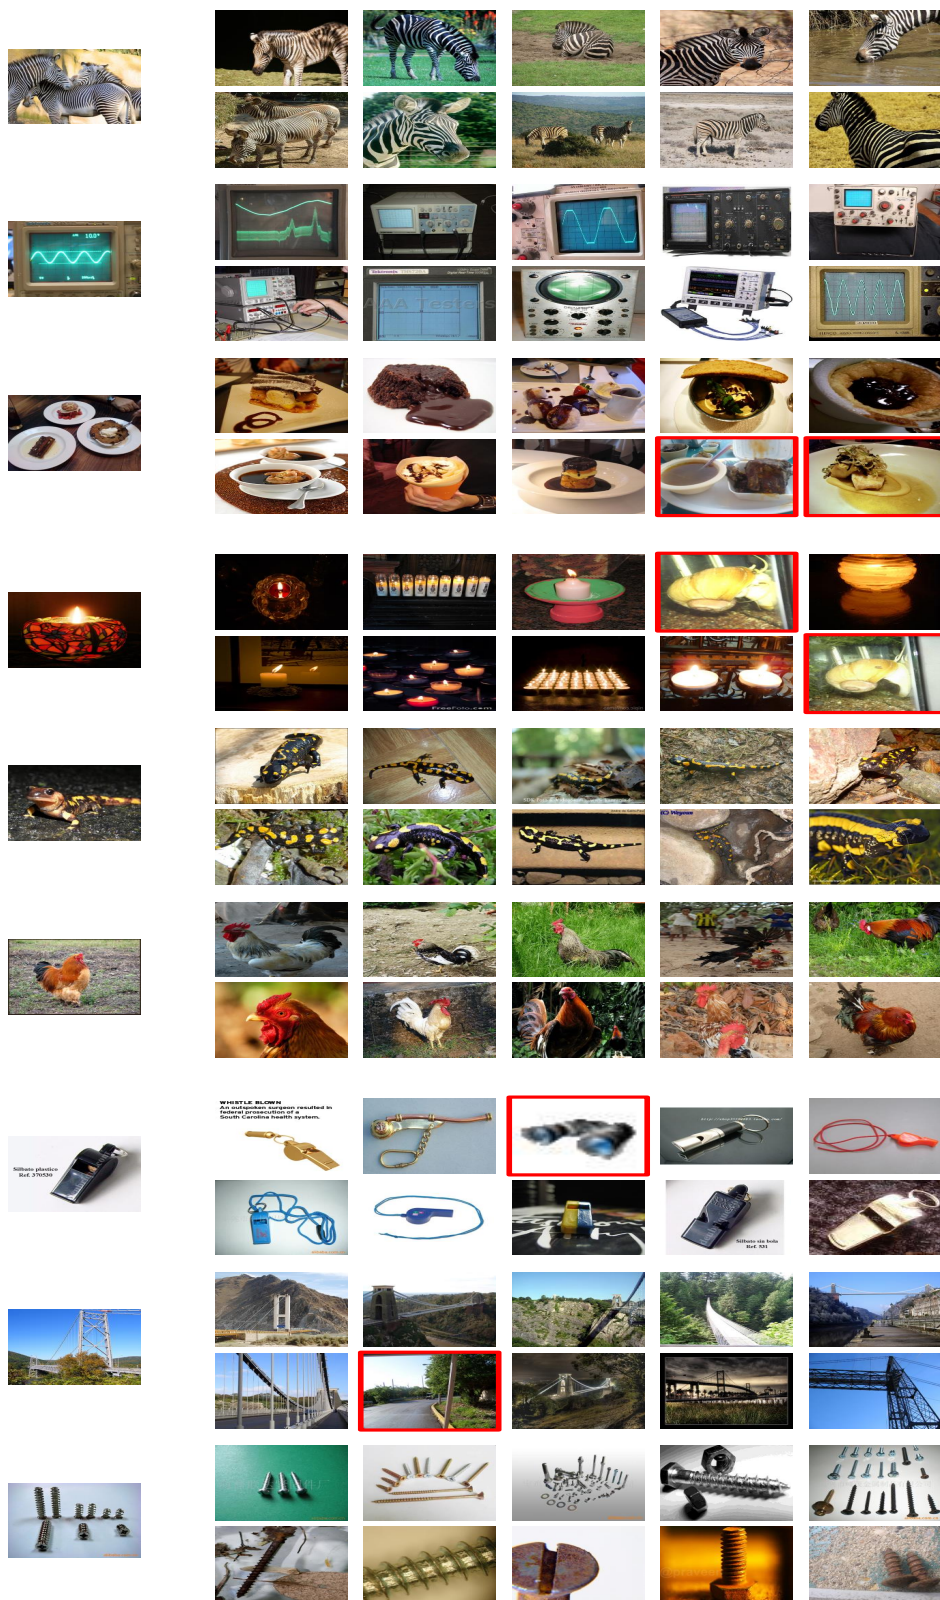

Figure 6. Retrieval results on the ImageNet dataset. We use red rectangles to denote false positives.

## References

- [1] A. Sablayrolles, M. Douze, N. Usunier, and H. Jégou. How should we evaluate supervised hashing? In *ICASSP*, 2017.
